# Supplementary material for: Human Genome Polymorphisms and Computational Intelligence Approach Revealed a Complex Genomic Signature for COVID-19 Severity in Brazilian Patients
Source: MDPI journal article supplement (doi:10.3390/v15030645), 2023-02-28
Supplement: s1 [file s1]

### Supplementary Material – Results for all evaluated classifiers

This table shows the metrics for all evaluated classifiers, over test set data in the Patient Prognosis phase (item 2.5 of manuscript) after feature selection phase. Inputs to each model are: rs1990760 (*IFIH1*), rs2161525 (*DC-SIGNR*), rs4251513 (*IRAK4*), rs3024498 (*IL10*), rs2508450 (*IL10RA*), rs16923189 (*PD-L2*), rs17804441 (*PD-L1*), rs1051922 (*IFNB1*), rs12340866 (*JAK2*), rs3771300 (*STAT1*), rs303215 (*IFIT1*), and rs17622656 (*IRF1*).

| Metrics          | Logistic Regression | KNN            | DT             | SVM – RBF Kernel | SVM – Linear Kernel |
|------------------|---------------------|----------------|----------------|------------------|---------------------|
| Test Accuracy    | 0.8500              | 0.5500         | 0.7000         | 0.7500           | 0.8500              |
| Specificity      | 0.8000              | 0.5000         | 0.5000         | 0.7000           | 0.9000              |
| Sensitivity      | 0.9000              | 0.6000         | 0.9000         | 0.8000           | 0.8000              |
| F1 Score         | 0.8421              | 0.5263         | 0.6250         | 0.7368           | 0.8571              |
| AUC              | 0.8500              | 0.5499         | 0.7000         | 0.7500           | 0.8500              |
| Confusion Matrix | [9 1]<br>[2 8]      | [6 4]<br>[5 5] | [9 1]<br>[5 5] | [8 2]<br>[3 7]   | [8 2]<br>[1 9]      |
